# Supplementary material for: Abundances of Clinically Relevant Antibiotic Resistance Genes and Bacterial Community Diversity in the Weihe River, China
Source: PubMed Central journal article supplement (PMC5923750; doi:10.3390/ijerph15040708), 2018-04-10

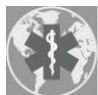

# Supplementary Materials: Abundances of Clinically Relevant Antibiotic Resistance Genes and Bacterial Community Diversity in the Weihe River, China

Xiaojuan Wang<sup>1</sup>, Jie Gu<sup>1,\*</sup>, Hua Gao<sup>1</sup>, Xun Qian<sup>1</sup> and Haichao Li<sup>1</sup>

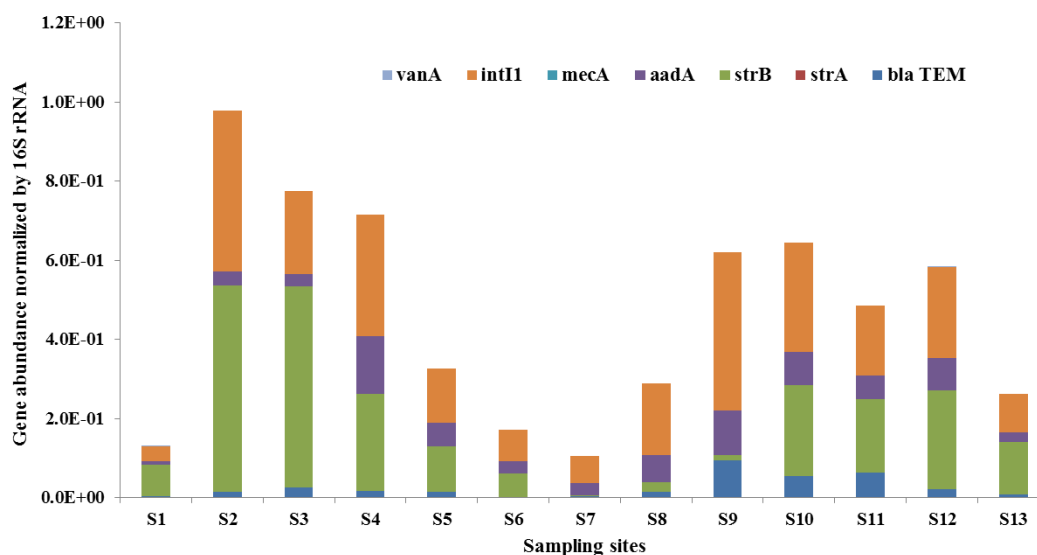

**Figure S1.** Total relative abundances of ARGs and *intI1* in water samples collected from the Weihe River.

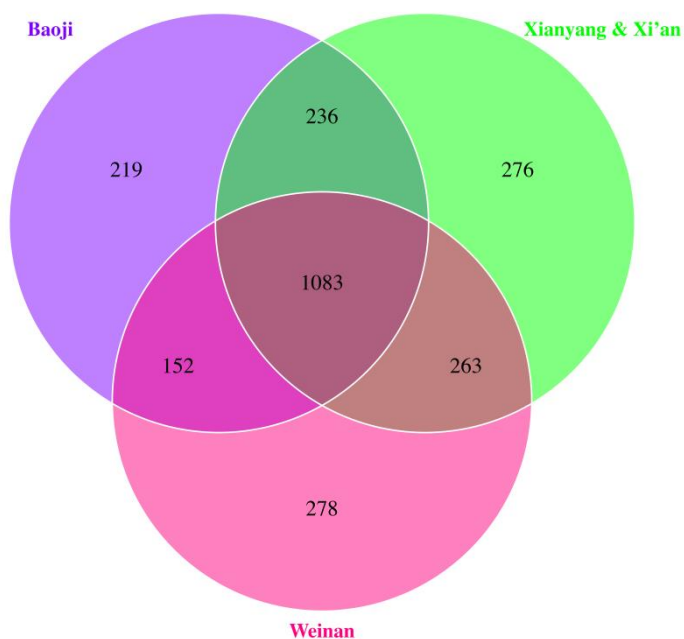

**Figure S2.** Venn diagrams showing the shared and distinct operational taxonomic units (OTUs) in different sites.

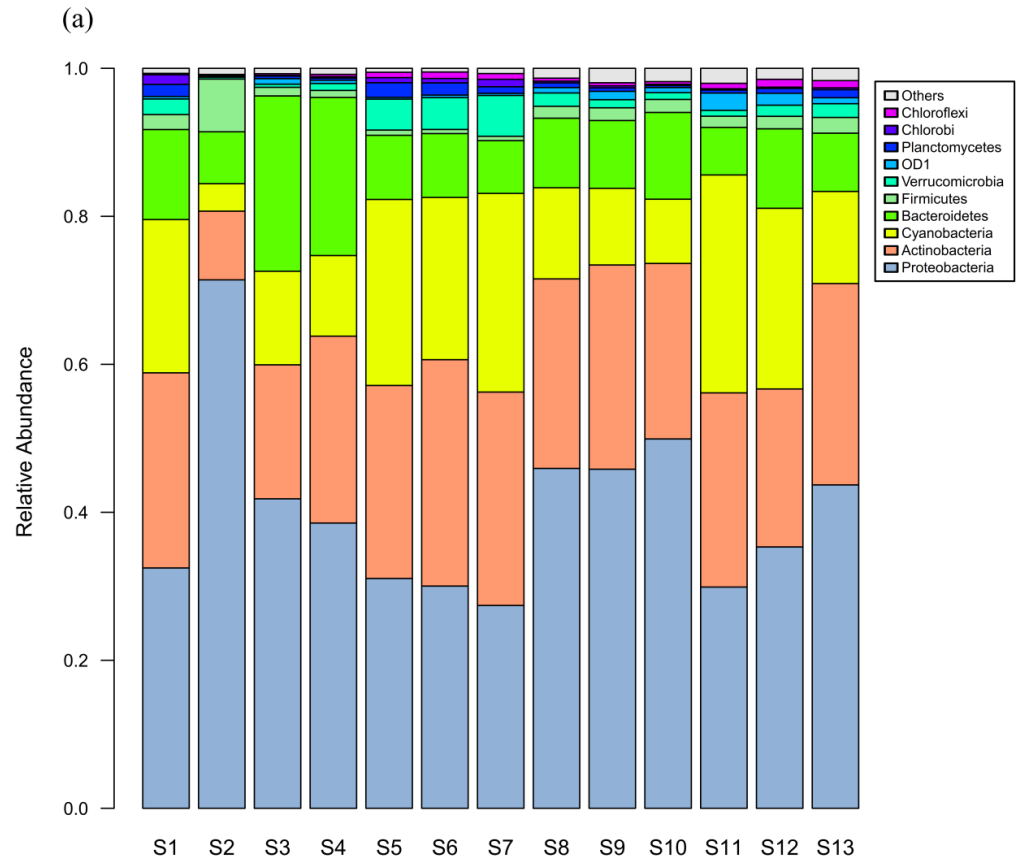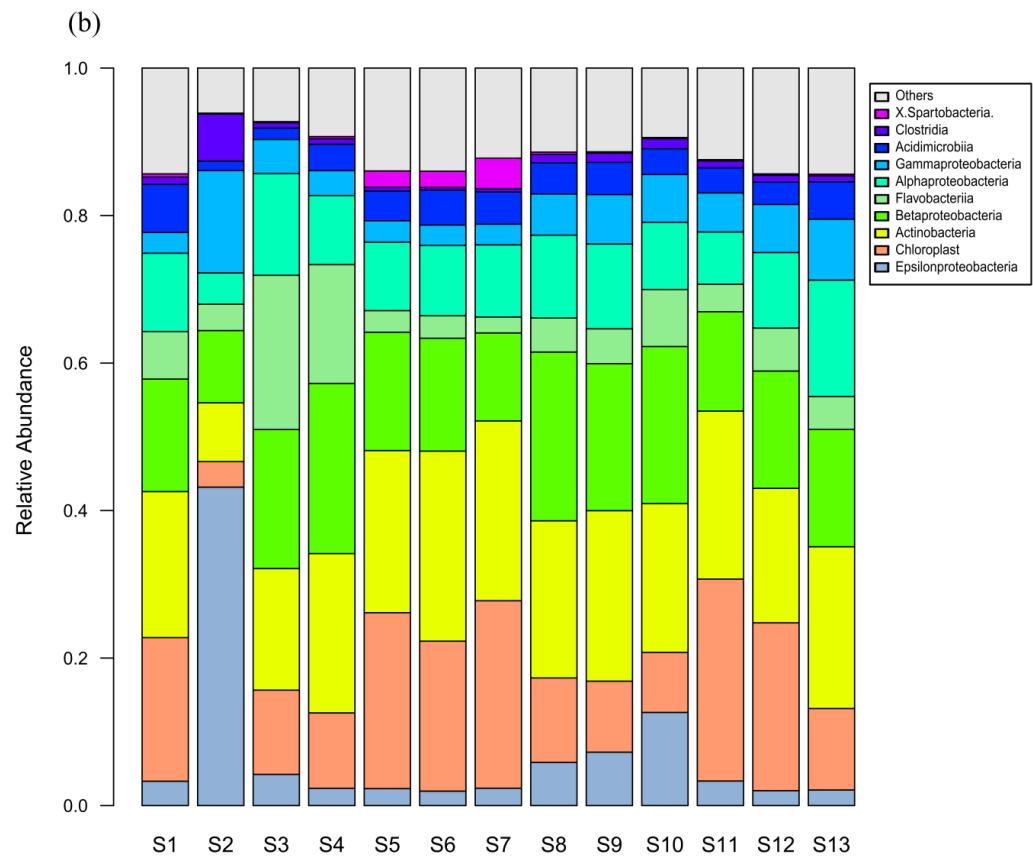

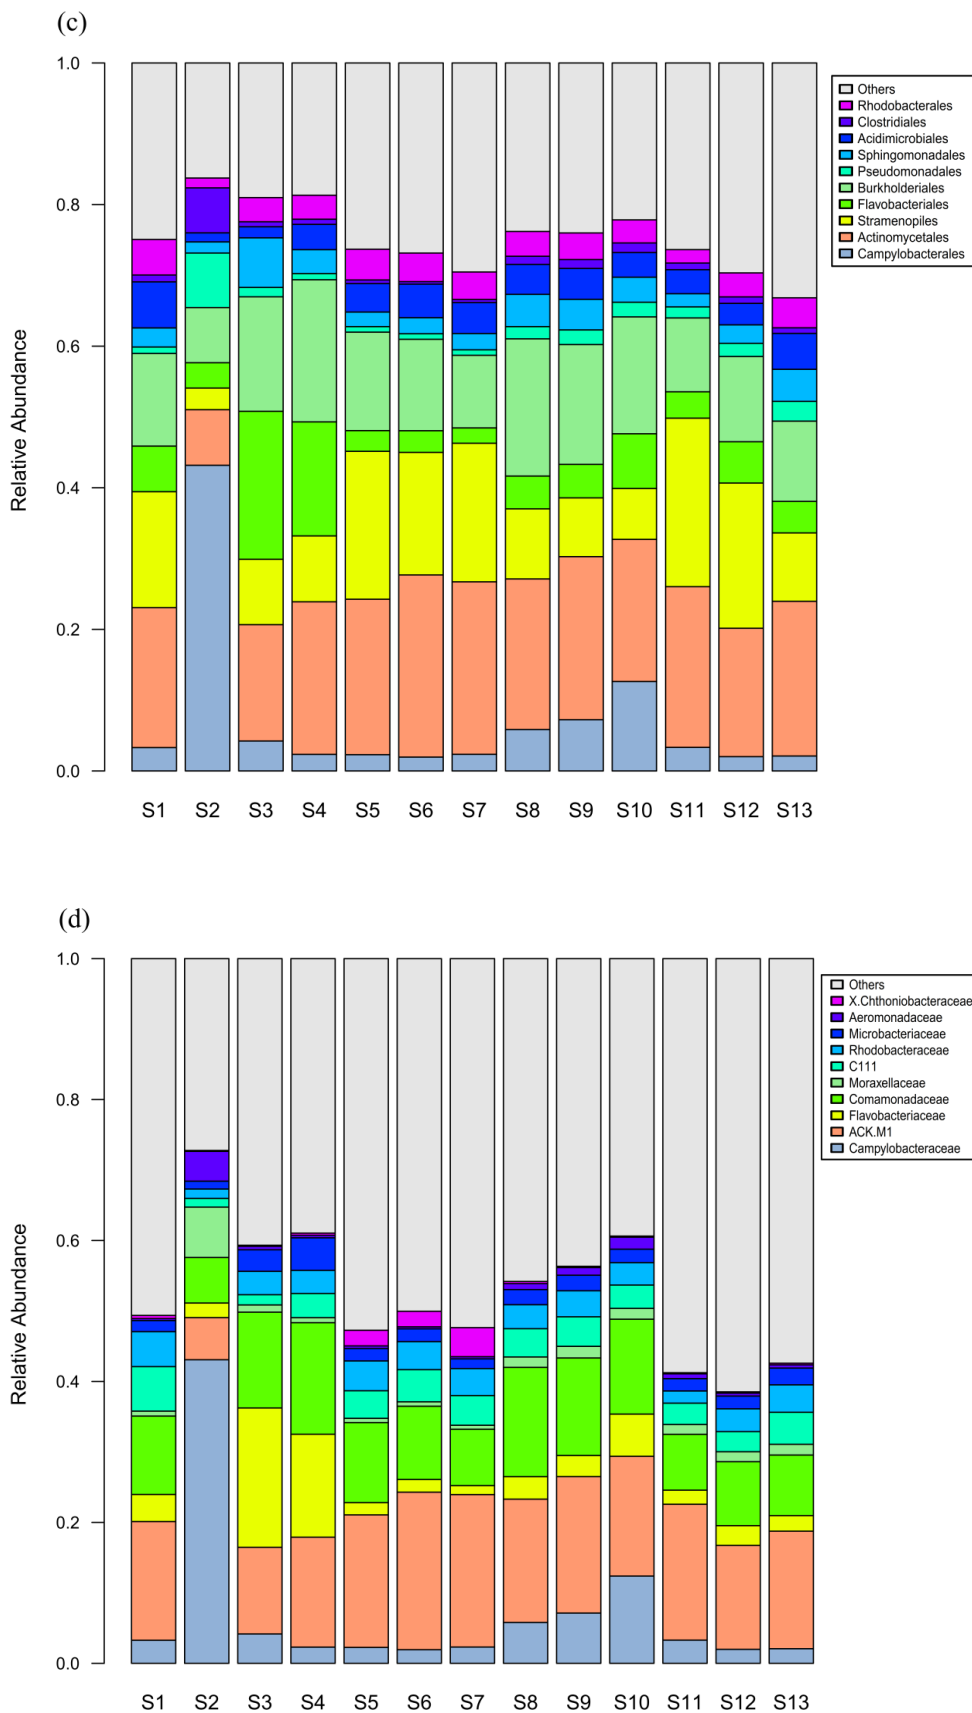

**Figure S3.** Distributions of the relative abundances of the 10 most abundant bacteria in the 13 samples at different levels: (a) phylum level; (b) class level; (c) order level; and (d) family level.

**Table S1.** Descriptions of the sampling sites.

| City              | Sample ID | Site                       | Urban/Rural | Location         |
|-------------------|-----------|----------------------------|-------------|------------------|
| Baoji             | S1        | Linjia Village             | Rural       | 107.05°E 34.36°N |
|                   | S2        | Wolongsi Bridge            | Urban       | 107.27°E 34.34°N |
|                   | S3        | Guozhen Bridge             | Urban       | 107.39°E 34.33°N |
|                   | S4        | Changxing Bridge           | Rural       | 107.83°E 34.21°N |
| Xianyang<br>Xi'an | S5        | Xingping                   | Rural       | 108.51°E 34.23°N |
|                   | S6        | Nanying                    | Rural       | 108.65°E 34.28°N |
|                   | and S7    | Xianyang Railway Bridge    | Rural       | 108.81°E 34.37°N |
|                   | S8        | Tianjiangrendu             | Urban       | 108.97°E 34.40°N |
|                   | S9        | Gengzhen Bridge            | Urban       | 109.11°E 34.45°N |
|                   | S10       | Xinfeng Bridge             | Urban       | 109.26°E 34.47°N |
| Weinan            | S11       | Shawangdu                  | Urban       | 109.50°E 34.53°N |
|                   | S12       | Shuyuan                    | Urban       | 109.60°E 34.52°N |
|                   | S13       | Tongguan Suspension Bridge | Rural       | 110.24°E 34.62°N |

**Table S2.** Primers and probes for the detection of clinically relevant antibiotic genes in this study.

| Class        | Target gene              | Primer sequence (5'→3')                                | Probe sequence                            | Amplicon size (bp) | Reference |
|--------------|--------------------------|--------------------------------------------------------|-------------------------------------------|--------------------|-----------|
| β-lactam     | <i>bla<sub>TEM</sub></i> | F-CACTATTCTCAGAATGACTTGGT<br>R-TGCATAATTCTTACTGTCATG   | FAM-CCAGTCACAGAAAAGCATCTTACGG-BHQ1        | 85                 | [31]      |
|              | <i>mecA</i>              | F-CGCAACGTTCAATTTAATTTTGTTAA<br>R-TGGTCTTTCTGCATTCTGGA | VIC-AATGACGCTATGATCCCAATCTAACTTCCACA-BHQ1 | 92                 | [32]      |
| vancomycin   | <i>vanA</i>              | F-CTGTGAGGTCGGTTGTGCG<br>R-TTTGGTCCACCTCGCCA           | FAM-CAACTAACGCGGCACTGTTCCCAAT-BHQ1        | 64                 | [33]      |
| streptomycin | <i>strA</i>              | F-TCAATCCCGACTTCTTACCG<br>R-CACCATGGCAAACAACCATA       | FAM-TGCTCGACCAAGAGCGGC-BHQ1               | 126                | [34]      |
|              | <i>strB</i>              | F-ATCGCTTTGCAGCTTTGTTT<br>R-ATGATGCAGATCGCCATGTA       | VIC-ATGCCTCGGAAGTGCCT-BHQ1                | 143                |           |
|              | <i>aadA</i>              | F-CAGCGCAATGACATTCTTGC<br>R-GTCGGCAGGACA(C/T)CCTTCG    | FAM-TGGTAGGTCCAGCGGCGGAG-BHQ1             | 295                |           |
| <i>int11</i> |                          | F-GCCTTGATGTTACCCGAGAG<br>R-GATCGGTCGAATGCCGTG         | VIC-ATTCCTGGCCGTGGTTCTGGGTTTT-BHQ1        | 196                | [35]      |
| 16S rRNA     |                          | F-TCTACGGGAGGCAGCAT<br>R-GGACTACCAGGGTATCTAATCCTGTT    | VIC-CGTATTACCGGCTGCTGGCAC-BHQ1            | 466                | [34]      |

**Table S3.** Raw and clean tags, OTUs, Good's coverage, and Shannon, Chao1, ACE, and Simpson's indices for the 13 water samples.

| Sample ID | Raw tags | Effective tags | OTU number | Good's coverage | Shannon | Chao 1   | ACE      | Simpson |
|-----------|----------|----------------|------------|-----------------|---------|----------|----------|---------|
| S1        | 147375   | 75725          | 1471       | 0.978           | 6.747   | 1316.694 | 1395.271 | 0.961   |
| S2        | 412139   | 206956         | 1849       | 0.98            | 5.488   | 1189.152 | 1244.642 | 0.869   |
| S3        | 90719    | 42527          | 1148       | 0.982           | 6.489   | 1067.38  | 1127.118 | 0.967   |
| S4        | 45508    | 20520          | 974        | 0.97            | 6.73    | 2835.082 | 1746.054 | 0.97    |
| S5        | 103522   | 53191          | 1270       | 0.98            | 6.37    | 1242.435 | 1282.704 | 0.944   |
| S6        | 215539   | 107237         | 1554       | 0.979           | 6.476   | 1290.15  | 1303.588 | 0.953   |
| S7        | 67992    | 33923          | 996        | 0.981           | 6.218   | 1179.19  | 1180.159 | 0.944   |
| S8        | 141226   | 65258          | 1617       | 0.975           | 6.995   | 1453.173 | 1559.622 | 0.974   |
| S9        | 52020    | 23979          | 1140       | 0.985           | 7.041   | 1092.96  | 1132.75  | 0.976   |
| S10       | 63319    | 29698          | 1190       | 0.981           | 6.864   | 1141.638 | 1275.748 | 0.973   |
| S11       | 60770    | 32636          | 1424       | 0.976           | 6.616   | 1494.455 | 1553.858 | 0.933   |
| S12       | 48273    | 24085          | 1286       | 0.982           | 6.921   | 1234.444 | 1314.747 | 0.951   |
| S13       | 93267    | 46152          | 1584       | 0.977           | 7.619   | 1498.083 | 1568.162 | 0.98    |

**Table S4.** Environmental factors used for redundancy analysis.

| Sample ID | Electrical conductivity ( $\mu\text{s}/\text{cm}$ ) | Temperature ( $^{\circ}\text{C}$ ) | pH   | Dissolved oxygen (mg/L) |
|-----------|-----------------------------------------------------|------------------------------------|------|-------------------------|
| S1        | 744                                                 | 18.2                               | 7.62 | 10.42                   |
| S2        | 755                                                 | 20.0                               | 8.57 | 3.56                    |
| S3        | 925                                                 | 21.5                               | 8.69 | 8.82                    |
| S4        | 829                                                 | 19.7                               | 8.10 | 11.62                   |
| S5        | 880                                                 | 18.4                               | 8.86 | 9.26                    |
| S6        | 891                                                 | 19.7                               | 8.70 | 9.63                    |
| S7        | 874                                                 | 20.3                               | 8.91 | 9.40                    |
| S8        | 808                                                 | 14.8                               | 8.18 | 10.00                   |
| S9        | 656                                                 | 13.2                               | 7.88 | 8.45                    |
| S10       | 975                                                 | 12.2                               | 7.97 | 8.06                    |
| S11       | 874                                                 | 13.8                               | 7.85 | 6.58                    |
| S12       | 950                                                 | 14.8                               | 7.96 | 7.67                    |
| S13       | 885                                                 | 13.2                               | 7.98 | 7.78                    |

**Table S5.** Pearson's correlation coefficients between genes and the main bacterial phyla \* Significantly different at  $p < 0.05$ . \*\*Significantly different at  $p < 0.01$ .

|                 | <i>bla<sub>TEM</sub></i> | <i>strA</i> | <i>strB</i> | <i>aadA</i> | <i>mecA</i> | <i>intI1</i> | <i>vanA</i> |
|-----------------|--------------------------|-------------|-------------|-------------|-------------|--------------|-------------|
| Proteobacteria  | 0.154                    | 0.04        | 0.575*      | 0.089       | 0.024       | 0.729**      | -0.238      |
| Actinobacteria  | 0.049                    | 0.025       | -0.891**    | 0.08        | 0.08        | -0.59*       | 0.038       |
| Cyanobacteria   | -0.15                    | -0.073      | -0.439      | -0.26       | -0.119      | -0.670*      | 0.247       |
| Bacteroidetes   | -0.070                   | -0.093      | 0.469       | 0.302       | 0.064       | 0.167        | 0.050       |
| Verrucomicrobia | -0.464                   | -0.063      | -0.631*     | -0.341      | -0.091      | -0.676*      | -0.013      |
| Firmicutes      | -0.023                   | 0.214       | 0.574*      | -0.181      | -0.064      | 0.534        | 0.027       |

**Table S6.** Pearson's correlation coefficients between the relative abundances of ARGs and the *intI1* gene. \* Significantly different at  $p < 0.05$ .

|                          | <i>bla<sub>TEM</sub></i> | <i>mecA</i> | <i>vanA</i> | <i>strA</i> | <i>strB</i> | <i>aadA</i> | <i>intI1</i> |
|--------------------------|--------------------------|-------------|-------------|-------------|-------------|-------------|--------------|
| <i>bla<sub>TEM</sub></i> | 1.000                    |             |             |             |             |             |              |
| <i>mecA</i>              | -0.370                   | 1.000       |             |             |             |             |              |
| <i>vanA</i>              | -0.249                   | 0.254       | 1.000       |             |             |             |              |
| <i>strA</i>              | -0.443                   | 0.534       | 0.480       | 1.000       |             |             |              |
| <i>strB</i>              | -0.051                   | -0.144      | -0.122      | -0.008      | 1.000       |             |              |
| <i>aadA</i>              | 0.515                    | -0.318      | -0.296      | -0.573*     | -0.051      | 1.000       |              |
| <i>intI1</i>             | 0.583*                   | -0.381      | -0.354      | -0.468      | 0.483       | 0.640*      | 1.000        |

**Table S7.** Pearson's correlation coefficients between genes and environmental factors. \* Significantly different at  $p < 0.05$ .

|                         | <i>bla<sub>TEM</sub></i> | <i>strA</i> | <i>strB</i> | <i>aadA</i> | <i>mecA</i> | <i>intI1</i> | <i>vanA</i> |
|-------------------------|--------------------------|-------------|-------------|-------------|-------------|--------------|-------------|
| pH                      | -0.425                   | -0.348      | 0.164       | -0.290      | -0.238      | -0.141       | -0.497      |
| Dissolved oxygen        | -0.235                   | -0.041      | -0.536      | 0.246       | 0.216       | -0.44        | 0.210       |
| Temperature             | -0.599*                  | -0.084      | 0.342       | -0.300      | -0.188      | -0.161       | 0.032       |
| Electrical conductivity | -0.261                   | -0.063      | 0.224       | -0.121      | 0.038       | -0.335       | -0.197      |

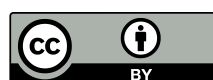

Supplement: ijerph-15-00708-s001.pdf [file ijerph-15-00708-s001.pdf]
